# Supplementary material for: Systematic Interrogation of 3q26 Identifies TLOC1 and SKIL as Cancer Drivers
Source: Oxford University Press journal article supplement (doi:10.1158/2159-8290.cd-12-0592), 2013-06-14
Supplement: 21598290cd120592-sup-supp_table_1.xlsx [file 21598290cd120592-sup-supp_table_1.xlsx]

## Sheet: Sheet1
Supplementary Table S1. Suppression efficiency of each shRNA determined by quantitative real time PCR in MCF7 cells.
hairpin ID	gene name	fold knockdown
XM_039796.9-931s1c1	TNIK	0.500069
XM_039796.9-4033s1c1	TNIK	0.744477
XM_039796.9-3935s1c1	TNIK	0.346758
XM_039796.9-2958s1c1	TNIK	0.276567
XM_039796.9-2358s1c1	TNIK	0.316856
NM_182610.1-971s1c1	SAMD7	1
NM_182610.1-424s1c1	SAMD7	1
NM_182610.1-1655s1c1	SAMD7	0.568921
NM_182610.1-1430s1c1	SAMD7	1
NM_182610.1-1189s1c1	SAMD7	0.0478347
NM_153353.2-949s1c1	LRRC34	0.432988
NM_153353.2-896s1c1	LRRC34	1
NM_153353.2-512s1c1	LRRC34	1
NM_153353.2-1225s1c1	LRRC34	1
NM_153353.2-1212s1c1	LRRC34	1
NM_032487.2-457s1c1	ARPM1	0.352125
NM_032487.2-1702s1c1	ARPM1	0.0482141
NM_032487.2-1286s1c1	ARPM1	0.88589
NM_032487.2-1065s1c1	ARPM1	1
NM_032487.2-1064s1c1	ARPM1	1
NM_024947.2-456s1c1	PHC3	0.831507
NM_024947.2-375s1c1	PHC3	0.662136
NM_024947.2-2808s1c1	PHC3	0.53119
NM_024947.2-2102s1c1	PHC3	0.48734
NM_024947.2-1557s1c1	PHC3	0.653519
NM_024727.1-380s1c1	LRRC31	1
NM_024727.1-1986s1c1	LRRC31	1
NM_024727.1-172s1c1	LRRC31	1
NM_024727.1-1632s1c1	LRRC31	1
NM_024727.1-1052s1c1	LRRC31	1
NM_022763.2-815s1c1	FNDC3B	0.523587
NM_022763.2-6603s1c1	FNDC3B	1
NM_022763.2-3598s1c1	FNDC3B	0.733516
NM_022763.2-2745s1c1	FNDC3B	0.544272
NM_022763.2-2735s1c1	FNDC3B	1
NM_020949.1-604s1c1	SLC7A14	1
NM_020949.1-2737s1c1	SLC7A14	1
NM_020949.1-2583s1c1	SLC7A14	1
NM_020949.1-1311s1c1	SLC7A14	0.7325
NM_020949.1-1100s1c1	SLC7A14	1
NM_020390.5-449s1c1	EIF5A2	0.190267
NM_020390.5-408s1c1	EIF5A2	0.216945
NM_020390.5-359s1c1	EIF5A2	0.368031
NM_020390.5-2776s1c1	EIF5A2	1
NM_018657.2-753s1c1	MYNN	1
NM_018657.2-732s1c1	MYNN	0.241953
NM_018657.2-233s1c1	MYNN	1
NM_018657.2-1883s1c1	MYNN	0.583539
NM_018657.2-1426s1c1	MYNN	0.699502
NM_014373.1-949s1c1	GPR160	0.407254
NM_014373.1-1474s1c1	GPR160	0.316988
NM_014373.1-1279s1c1	GPR160	0.279632
NM_014373.1-1186s1c1	GPR160	0.644968
NM_014373.1-1154s1c1	GPR160	0.237105
NM_011443.2-850s1c1	SOX2	1
NM_011443.2-1665s1c1	SOX2	1
NM_011443.2-1027s1c1	SOX2	1
NM_006218.x-79s1c1	PIK3CA	0.56175
NM_006218.2-3471s1c1	PIK3CA	0.367827
NM_006218.2-3455s1c1	PIK3CA	0.30939
NM_006218.2-2892s1c1	PIK3CA	0.356729
NM_006218.2-1900s1c1	PIK3CA	0.58593
NM_006218.2-1639s1c1	PIK3CA	0.611278
NM_006218.1-924s1c1	PIK3CA	1
NM_006218.1-3251s1c1	PIK3CA	0.545935
NM_006218.1-2368s1c1	PIK3CA	0.558682
NM_006218.1-2145s1c1	PIK3CA	0.378273
NM_006218.1-1057s1c1	PIK3CA	0.29689
NM_005602.4-759s1c1	CLDN11	0.850687
NM_005602.4-632s1c1	CLDN11	0.461723
NM_005602.4-487s1c1	CLDN11	0.368286
NM_005602.4-253s1c1	CLDN11	0.907456
NM_005602.4-1013s1c1	CLDN11	0.649094
NM_005414.2-886s1c1	SKIL	1
NM_005414.2-2817s1c1	SKIL	0.22644
NM_005414.2-2643s1c1	SKIL	1
NM_005414.2-1651s1c1	SKIL	1
NM_005414.2-1068s1c1	SKIL	0.81915
NM_005241.x-947s1c1	EVI1	0.824848
NM_005241.x-3524s1c1	EVI1	1
NM_005241.x-3261s1c1	EVI1	1
NM_005241.x-3043s1c1	EVI1	0.625985
NM_005241.x-2167s1c1	EVI1	1
NM_004991.1-860s1c1	MDS1	0.186843
NM_004991.1-712s1c1	MDS1	1
NM_004991.1-506s1c1	MDS1	1
NM_004991.1-380s1c1	MDS1	1
NM_004991.1-339s1c1	MDS1	1
NM_003262.2-649s1c1	TLOC1	0.368031
NM_003262.2-1780s1c1	TLOC1	0.341415
NM_003262.2-1591s1c1	TLOC1	0.735196
NM_003262.2-1267s1c1	TLOC1	0.0355526
NM_003262.2-1159s1c1	TLOC1	0.515842
NM_003106.x-787s1c1	SOX2	0.461115
NM_003106.x-2378s1c1	SOX2	0.732601
NM_003106.x-1060s1c1	SOX2	1
NM_002740.3-973s1c1	PRKCI	1
NM_002740.3-731s1c1	PRKCI	0.672455
NM_002740.3-499s1c1	PRKCI	0.908646
NM_002740.3-2090s1c1	PRKCI	0.965615
NM_002740.3-1284s1c1	PRKCI	0.999016
NM_002662.x-520s1c1	PLD1	0.520475
NM_002662.x-437s1c1	PLD1	0.883928
NM_002662.x-3415s1c1	PLD1	0.673944
NM_002662.x-1412s1c1	PLD1	1
NM_002662.x-1197s1c1	PLD1	0.617281
NM_000340.1-700s1c1	SLC2A2	1
NM_000340.1-510s1c1	SLC2A2	1
NM_000340.1-406s1c1	SLC2A2	0.929805
NM_000340.1-1476s1c1	SLC2A2	1
NM_000340.1-1402s1c1	SLC2A2	1
