# Supplementary material for: Systematic Interrogation of 3q26 Identifies TLOC1 and SKIL as Cancer Drivers
Source: Oxford University Press journal article supplement (doi:10.1158/2159-8290.cd-12-0592), 2013-06-14
Supplement: 21598290cd120592-sup-supp_table_5.xlsx [file 21598290cd120592-sup-supp_table_5.xlsx]

## Sheet: Sheet1
Supplementary Table S5. Intersect of gene expression signatures that correlate with either high SKIL or low SMAD4 gene expression.
low SMAD4	intersect low SMAD4/ high SKIL	high SKIL
SMAD4	TCF8	SKIL
IER3IP1	EHF	C15ORF48
NARS	GRHL2	KCNMB3
UCHL1	FOXQ1	CLDN7
ITGB4	EVA1	GDA
CDH2	TACSTD2	FAM110C
SDC2	SERPINB5	LSM7
RP3-477H23.1	MARVELD3	CHMP7
PIK3C3	ST14	GCAT
PLEKHO1	TMEM30B	TIMM13
KLK10	RAB25	ATP6V1B2
B3GNT3	SCNN1A	DMKN
ARMCX1	TWIST1	TMEM103
C1ORF116		MARS2
ACSL5		ACTR8
TXNL1		TUBB3
POLI		C17ORF81
S100P		TMC4
ZNF542		RNF207
LAD1		SPARC
MPDZ		SGTA
OSBPL6		MRPS2
TRIM29		LOC130576
MAP1B		POLR3D
GJB3		MRPL24
C18ORF54		SLC25A11
PRKD1		TNFSF10
CBLC		CLIC3
C1ORF116		TMEM139
SH2D3A		CLPP
EML1		CYFIP2
EREG		NLE1
IPW		SLPI
ID4		FARSLA
ID3		PMPCA
MST1R		P117
LDOC1		MON1A
