# Supplementary material for: Systematic Interrogation of 3q26 Identifies TLOC1 and SKIL as Cancer Drivers
Source: Oxford University Press journal article supplement (doi:10.1158/2159-8290.cd-12-0592), 2013-06-14
Supplement: 21598290cd120592-sup-supp_table_6.xlsx [file 21598290cd120592-sup-supp_table_6.xlsx]

## Sheet: Sheet1
Supplementary Table S6. Primers used to generate TLOC1 truncation mutants.
Primer name	Sequence
TLOC1 forward BP	GGGGACAACTTTGTACAAAAAAGTTGGCATGGCGGAACGCAGGAGA
TLOC1 reverse BP	GGGGACAACTTTGTACAAGAAAGTTGGGTATGATTTTTCATGTGAAGATTTAGGTGT
TLOC1 reverse delta C27 BP	GGGGACAACTTTGTACAAGAAAGTTGGGTATTCCAGTTCCTCTTTTGTTATCA
TLOC1 forward delta N81 BP	GGGGACAACTTTGTACAAAAAAGTTGGCATGTGCAACAGGCTTTTAAAGAAG
TLOC1 forward delta N149 BP	GGGGACAACTTTGTACAAAAAAGTTGGCATGTCCAAAAAGGAGGAAACTCC
