# Supplementary material for: Systematic Interrogation of 3q26 Identifies TLOC1 and SKIL as Cancer Drivers
Source: Oxford University Press journal article supplement (doi:10.1158/2159-8290.cd-12-0592), 2013-06-14
Supplement: 21598290cd120592-sup-supp_table_7.xlsx [file 21598290cd120592-sup-supp_table_7.xlsx]

## Sheet: shRNAs
Supplementary Table S7. List of shRNAs used in this study.
Proliferation screen
symbol	cloneId	cloneName
EVI1	TRCN0000002528	NM_005241.x-3043s1c1
EVI1	TRCN0000002529	NM_005241.x-947s1c1
EVI1	TRCN0000002530	NM_005241.x-3261s1c1
EVI1	TRCN0000002531	NM_005241.x-2167s1c1
EVI1	TRCN0000002532	NM_005241.x-3524s1c1
MDS1	TRCN0000015583	NM_004991.1-860s1c1
MDS1	TRCN0000015584	NM_004991.1-339s1c1
MDS1	TRCN0000015585	NM_004991.1-506s1c1
MDS1	TRCN0000015586	NM_004991.1-712s1c1
MDS1	TRCN0000015587	NM_004991.1-380s1c1
ARPM1	TRCN0000113921	NM_032487.2-1702s1c1
ARPM1	TRCN0000113922	NM_032487.2-1286s1c1
ARPM1	TRCN0000113923	NM_032487.2-457s1c1
ARPM1	TRCN0000113924	NM_032487.2-1064s1c1
ARPM1	TRCN0000113925	NM_032487.2-1065s1c1
MYNN	TRCN0000016328	NM_018657.2-732s1c1
MYNN	TRCN0000016329	NM_018657.2-1883s1c1
MYNN	TRCN0000016330	NM_018657.2-1426s1c1
MYNN	TRCN0000016331	NM_018657.2-233s1c1
MYNN	TRCN0000016332	NM_018657.2-753s1c1
LRRC34	TRCN0000135818	NM_153353.2-1225s1c1
LRRC34	TRCN0000134357	NM_153353.2-896s1c1
LRRC34	TRCN0000134550	NM_153353.2-1212s1c1
LRRC34	TRCN0000135144	NM_153353.2-512s1c1
LRRC34	TRCN0000135516	NM_153353.2-949s1c1
SLC7A14	TRCN0000151485	NM_020949.1-2737s1c1
SLC7A14	TRCN0000157330	NM_020949.1-604s1c1
SLC7A14	TRCN0000156863	NM_020949.1-1311s1c1
SLC7A14	TRCN0000156118	NM_020949.1-1100s1c1
SLC7A14	TRCN0000157089	NM_020949.1-2583s1c1
LRRC31	TRCN0000151701	NM_024727.1-1632s1c1
LRRC31	TRCN0000157663	NM_024727.1-1986s1c1
LRRC31	TRCN0000150319	NM_024727.1-1052s1c1
LRRC31	TRCN0000154261	NM_024727.1-172s1c1
LRRC31	TRCN0000153288	NM_024727.1-380s1c1
SAMD7	TRCN0000135097	NM_182610.1-971s1c1
SAMD7	TRCN0000136387	NM_182610.1-424s1c1
SAMD7	TRCN0000136034	NM_182610.1-1430s1c1
SAMD7	TRCN0000134301	NM_182610.1-1655s1c1
SAMD7	TRCN0000136212	NM_182610.1-1189s1c1
TLOC1	TRCN0000062868	NM_003262.2-1591s1c1
TLOC1	TRCN0000062869	NM_003262.2-1159s1c1
TLOC1	TRCN0000062870	NM_003262.2-1780s1c1
TLOC1	TRCN0000062871	NM_003262.2-649s1c1
TLOC1	TRCN0000062872	NM_003262.2-1267s1c1
GPR160	TRCN0000011483	NM_014373.1-1474s1c1
GPR160	TRCN0000011484	NM_014373.1-1279s1c1
GPR160	TRCN0000011485	NM_014373.1-1154s1c1
GPR160	TRCN0000011486	NM_014373.1-949s1c1
GPR160	TRCN0000011487	NM_014373.1-1186s1c1
PHC3	TRCN0000140887	NM_024947.2-2808s1c1
PHC3	TRCN0000139438	NM_024947.2-375s1c1
PHC3	TRCN0000139508	NM_024947.2-2102s1c1
PHC3	TRCN0000139200	NM_024947.2-1557s1c1
PHC3	TRCN0000142291	NM_024947.2-456s1c1
PRKCI	TRCN0000006037	NM_002740.3-2090s1c1
PRKCI	TRCN0000006038	NM_002740.3-731s1c1
PRKCI	TRCN0000006039	NM_002740.3-1284s1c1
PRKCI	TRCN0000006040	NM_002740.3-499s1c1
PRKCI	TRCN0000006041	NM_002740.3-973s1c1
CLDN11	TRCN0000116733	NM_005602.4-487s1c1
CLDN11	TRCN0000116732	NM_005602.4-1013s1c1
CLDN11	TRCN0000116734	NM_005602.4-632s1c1
CLDN11	TRCN0000116735	NM_005602.4-759s1c1
CLDN11	TRCN0000116736	NM_005602.4-253s1c1
SKIL	TRCN0000107120	NM_005414.2-2817s1c1
SKIL	TRCN0000107121	NM_005414.2-1651s1c1
SKIL	TRCN0000107122	NM_005414.2-886s1c1
SKIL	TRCN0000107123	NM_005414.2-2643s1c1
SKIL	TRCN0000107124	NM_005414.2-1068s1c1
EIF5A2	TRCN0000148140	NM_020390.5-2776s1c1
EIF5A2	TRCN0000146713	NM_020390.5-359s1c1
EIF5A2	TRCN0000147429	NM_020390.5-449s1c1
EIF5A2	TRCN0000147855	NM_020390.5-408s1c1
SLC2A2	TRCN0000043598	NM_000340.1-510s1c1
SLC2A2	TRCN0000043599	NM_000340.1-1476s1c1
SLC2A2	TRCN0000043600	NM_000340.1-700s1c1
SLC2A2	TRCN0000043601	NM_000340.1-1402s1c1
SLC2A2	TRCN0000043602	NM_000340.1-406s1c1
TNIK	TRCN0000037514	XM_039796.9-3935s1c1
TNIK	TRCN0000037515	XM_039796.9-931s1c1
TNIK	TRCN0000037516	XM_039796.9-2958s1c1
TNIK	TRCN0000037517	XM_039796.9-2358s1c1
TNIK	TRCN0000037518	XM_039796.9-4033s1c1
PLD1	TRCN0000010571	NM_002662.x-3415s1c1
PLD1	TRCN0000010572	NM_002662.x-520s1c1
PLD1	TRCN0000001009	NM_002662.x-437s1c1
PLD1	TRCN0000001010	NM_002662.x-1197s1c1
PLD1	TRCN0000001011	NM_002662.x-1412s1c1
FNDC3B	TRCN0000082773	NM_022763.2-6603s1c1
FNDC3B	TRCN0000082774	NM_022763.2-2745s1c1
FNDC3B	TRCN0000082775	NM_022763.2-2735s1c1
FNDC3B	TRCN0000082776	NM_022763.2-815s1c1
FNDC3B	TRCN0000082777	NM_022763.2-3598s1c1
GFP1		clonetechGfp_438s1c1
GFP2		clonetechGfp_228s1c1
GFP3		clonetechGfp_453s1c1
GFP4		clonetechGfp_437s1c1
GFP5		clonetechGfp_693s1c1
GFP6		clonetechGfp_696s1c1
GFP7		clonetechGfp_684s1c1
GFP8		clonetechGfp_436s1c1
GFP9		clonetechGfp_587s1c1
GFP10		clonetechGfp_692s1c1
TLOC1 associated proteins
DDX3X	TRCN0000000002	NM_001356.x-1157s1c1
DDX3X	TRCN0000000003	NM_001356.x-1940s1c1
SRRM2	TRCN0000000176	NM_016333.x-2687s1c1
SRRM2	TRCN0000000177	NM_016333.x-2974s1c1
HSPA5	TRCN0000001023	NM_005347.x-1593s1c1
HSPA5	TRCN0000001024	NM_005347.x-1285s1c1
DDX5	TRCN0000001128	NM_004396.x-385s1c1
DDX5	TRCN0000001130	NM_004396.x-1344s1c1
HNRNPM	TRCN0000001243	NM_005968.x-444s1c1
HNRNPM	TRCN0000001246	NM_005968.x-1000s1c1
CAND1	TRCN0000003459	NM_018448.x-2170s1c1
CAND1	TRCN0000003462	NM_018448.x-2355s1c1
SEC61G	TRCN0000005534	NM_014302.2-322s1c1
SEC61G	TRCN0000005536	NM_014302.2-209s1c1
ATP6V1A	TRCN0000029542	NM_001690.2-486s1c1
ATP6V1A	TRCN0000029543	NM_001690.2-1832s1c1
PKM2	TRCN0000037610	NM_182471.1-1021s1c1
PKM2	TRCN0000037612	NM_182471.1-566s1c1
YWHAE	TRCN0000062234	NM_006761.3-622s1c1
YWHAE	TRCN0000062233	NM_006761.3-736s1c1
PABPC1	TRCN0000074639	NM_002568.3-2019s1c1
PABPC1	TRCN0000074640	NM_002568.3-1829s1c1
EIF2B5	TRCN0000083988	NM_003907.1-2342s1c1
EIF2B5	TRCN0000083989	NM_003907.1-2108s1c1
SEC63	TRCN0000147202	NM_007214.2-2263s1c1
SEC63	TRCN0000147847	NM_007214.2-1560s1c1
EIF3C	TRCN0000148740	NM_003752.2-1318s1c1
EIF3C	TRCN0000150015	NM_003752.2-1610s1c1
IPO7	TRCN0000156655	NM_006391.1-3259s1c1
IPO7	TRCN0000156994	NM_006391.1-3042s1c1
IPO9	TRCN0000160702	NM_018085.3-1288s1c1
IPO9	TRCN0000161611	NM_018085.3-2941s1c1
Invasion
SNAI1	TRCN0000063819	NM_005985.2-514s1c1
SNAI1	TRCN0000063821	NM_005985.2-504s1c1
SNAI2	TRCN0000015388	NM_003068.3-1315s1c1
SNAI2	TRCN0000015389	NM_003068.3-865s1c1
TWIST1	TRCN0000020539	NM_000474.2-951s1c1
TWIST1	TRCN0000020540	NM_000474.2-129s1c1
SMAD4	TRCN0000040032	NM_005359.3-1848s1c1
SMAD4	TRCN0000010323	NM_005359.x-2493s1c1
